# Supplementary material for: Diet and Pediatric Functional Gastrointestinal Disorders in Mediterranean Countries
Source: MDPI journal article supplement (doi:10.3390/nu14112335), 2022-06-02
Supplement: s1 [file s1]

**Supplementary Table S1: Overall FGIDs Prevalence in Children (Group A) and Adolescents (Group B)**

|                                        | <b>Group A</b><br><b>n=1972</b><br><b>mean age:7.3 ± 1.6y</b><br><b>F 53%</b> |              |              | <b>Group B</b><br><b>n=2450</b><br><b>mean age:13.1 ± 2.3 y</b><br><b>F 57.6%</b> |              |              |
|----------------------------------------|-------------------------------------------------------------------------------|--------------|--------------|-----------------------------------------------------------------------------------|--------------|--------------|
|                                        | <b>Valid case</b>                                                             | <b>n (%)</b> | <b>95%CI</b> | <b>Valid case</b>                                                                 | <b>n (%)</b> | <b>95%CI</b> |
| <b>Cyclic vomiting Syndrome</b>        | 1901                                                                          | 3 (0.16%)    | (0.03; 0.46) | 2370                                                                              | 10 (0.42%)   | (0.20; 0.77) |
| <b>Functional Nausea</b>               | 1823                                                                          | 0            |              | 2232                                                                              | 10 (0.45%)   | (0.22; 0.82) |
| <b>Functional Vomiting</b>             | 1886                                                                          | 2 (0.11%)    | (0.01; 0.38) | 2360                                                                              | 9 (0.38%)    | (0.17; 0.72) |
| <b>Adolescent Rumination Syndrome</b>  | 1840                                                                          | 1 (0.05%)    | (0.01; 0.30) | 2340                                                                              | 10 (0.43%)   | (0.21; 0.78) |
| <b>Aerophagia</b>                      | 1843                                                                          | 7 (0.38%)    | (0.15; 0.78) | 2355                                                                              | 9 (0.38%)    | (0.17; 0.72) |
| <b>Postprandial Distress Syndrome</b>  | 1642                                                                          | 55 (3.35%)   | (2.53; 4.34) | 2198                                                                              | 118 (5.37%)  | (4.46; 6.39) |
| <b>Epigastric Pain Syndrome</b>        | 1619                                                                          | 4 (0.25%)    | (0.07; 0.63) | 2144                                                                              | 25 (1.17%)   | (0.76; 1.72) |
| <b>Irritable Bowel Syndrome</b>        | 1793                                                                          | 11 (0.61%)   | (0.31; 1.09) | 2250                                                                              | 25 (1.11%)   | (0.72; 1.64) |
| <b>Abdominal Migraine</b>              | 1877                                                                          | 21 (1.12%)   | (0.69; 1.71) | 2347                                                                              | 65 (2.77%)   | (2.14; 3.52) |
| <b>Functional Abdominal Pain-NOS</b>   | 1850                                                                          | 11 (0.59%)   | (0.30; 1.06) | 2333                                                                              | 9 (0.39%)    | (0.18; 0.73) |
| <b>Functional Constipation</b>         | 1930                                                                          | 144 (7.46%)  | (6.33; 8.73) | 2423                                                                              | 331 (13.7%)  | (12.3; 15.1) |
| <b>Nonretentive Fecal Incontinence</b> | 1883                                                                          | 0            | -            | 2294                                                                              | 0            | -            |

Note: Functional Abdominal Pain-NOS: Functional Abdominal Pain-Not Otherwise Specified

**Supplementary Table S2. Valid case and prevalence (%) of each functional gastrointestinal disorder in children (Group A) and adolescents (Group B), in all involved countries**

|                                          | GROUP A          |                 |                 |                |                    |                 | GROUP B          |                 |                 |                |                    |                 |
|------------------------------------------|------------------|-----------------|-----------------|----------------|--------------------|-----------------|------------------|-----------------|-----------------|----------------|--------------------|-----------------|
|                                          | Croatia<br>n=379 | Greece<br>n=310 | Israel<br>n=140 | Italy<br>n=369 | Macedonia<br>n=376 | Serbia<br>n=398 | Croatia<br>n=462 | Greece<br>n=355 | Israel<br>n=379 | Italy<br>n=371 | Macedonia<br>n=433 | Serbia<br>n=450 |
| <b>FGIDs, (valid case), % prevalence</b> |                  |                 |                 |                |                    |                 |                  |                 |                 |                |                    |                 |
| <b>FGIDs</b>                             | (292) 12%        | (270) 18%       | (75) 33%        | (239) 26%      | (226) 12%          | (332) 8%        | (308) 18%        | (348) 16%       | (319) 50%       | (263) 26%      | (280) 33%          | (365) 18%       |
| <b>Cyclic vomiting Syndrome</b>          | (370) 0          | (309) 0.32%     | (130) 0         | (132) 0        | (365) 0.55%        | (395) 0         | (449) 0.45%      | (350) 0         | (374) 1.34%     | (345) 0        | (412) 0.24%        | (440) 0.45%     |
| <b>Functional Nausea</b>                 | (363) 0          | (306) 0         | (128) 0         | (414) 0        | (321) 0            | (391) 0         | (430) 0.47%      | (341) 0         | (351) 0.57%     | (330) 0.91%    | (345) 0.29%        | (435) 0.46%     |
| <b>Functional Vomiting</b>               | (367) 0          | (309) 0         | (129) 0         | (332) 0.30%    | (360) 0.28%        | (389) 0         | (459) 0          | (349) 0         | (373) 1.88%     | (345) 0.58%    | (408) 0            | (435) 0         |
| <b>Adolescent Rumination Syndrome</b>    | (362) 0          | (307) 0         | (107) 0         | (325) 0.31%    | (345) 0            | (394) 0         | (438) 0.68%      | (348) 0         | (368) 1.90%     | (346) 0        | (400) 0            | (440) 0         |
| <b>Aerophagia</b>                        | (371) 0.54%      | (303) 0         | (126) 0         | (313) 0.96%    | (344) 0.58%        | (386) 0         | (447) 0          | (350) 0         | (368) 0.54%     | (349) 0.57%    | (396) 0.51%        | (445) 0.67%     |
| <b>Postprandial Distress Syndrome</b>    | (320) 4.69%      | (275) 3.27%     | (96) 12.50%     | (271) 4.43%    | (292) 0.34%        | (388) 1.55%     | (394) 5.84%      | (320) 2.81%     | (356) 12.08%    | (322) 6.52%    | (375) 2.67%        | (431) 2.78%     |
| <b>Epigastric Pain Syndrome</b>          | (314) 0.64%      | (274) 0         | (93) 0          | (268) 0.75%    | (283) 0            | (387) 0         | (388) 0.77%      | (319) 0.31%     | (343) 1.46%     | (314) 2.55%    | (356) 1.40%        | (424) 0.71%     |
| <b>Irritable Bowel Syndrome</b>          | (356) 1.69%      | (296) 0         | (130) 5.38%     | (301) 0.33%    | (331) 1.81%        | (379) 0.26%     | (431) 0.93%      | (339) 0.88%     | (346) 3.47%     | (323) 0.62%    | (379) 0.26%        | (432) 0.69%     |
| <b>Abdominal Migraine</b>                | (364) 0.55%      | (304) 0.66%     | (134) 1.49%     | (329) 0.61%    | (360) 0.83%        | (386) 2.59%     | (442) 1.13%      | (345) 1.74%     | (366) 9.84%     | (342) 1.46%    | (419) 2.86%        | (433) 0.23%     |
| <b>Functional Abdominal Pain-NOS</b>     | (361) 1.11%      | (302) 0.33%     | (132) 0.76%     | (318) 0.63%    | (344) 0.29%        | (393) 0.51%     | (436) 0.23%      | (344) 0.29%     | (364) 0.82%     | (339) 0.59%    | (407) 0            | (443) 0.45%     |
| <b>Functional Constipation</b>           | (378) 4.50%      | (310) 13.55%    | (136) 5.88%     | (338) 13.90%   | (370) 5.95%        | (398) 2.01%     | (358) 6.55%      | (354) 11.02%    | (373) 26.81%    | (368) 10.33%   | (420) 17.38%       | (450) 11.33%    |
| <b>Nonretentive Fecal Incontinence</b>   | (376) 0          | (305) 0         | (136) 0         | (317) 0        | (354) 0            | (395) 0         | (449) 0          | (348) 0         | (363) 0         | (301) 0        | (394) 0            | (439) 0         |

Note: Functional Abdominal Pain-NOS: Functional Abdominal Pain-Not Otherwise Specified
